# Supplementary material
Source: Royal Society of Chemistry journal article supplement (doi:10.1039/d5tb02613j)
Supplement: d5tb02613j1.pdf [file d5tb02613j1.pdf]

## **Elaboration of antibacterial polyurethanes for medical devices by a scalable process**

*Baptiste Caron, Marc Maresca, Amélie Leroux, Marie Lemesle, Jean Louis Coussegal, Loic Fontaine, Elizabeth A. Murphy, Christopher M. Bates, Phong H. Nguyen, Phillip A. Kohl, Olivier Soppera, Stephane Canaan, Isabelle Poncin, Yohann Guillaneuf and Catherine Lefay\**

Dr. L. Fontaine, Dr. B. Caron, Dr. Y. Guillaneuf, Dr. C. Lefay,  
Aix-Marseille Université, CNRS, Institut de Chimie Radicalaire UMR 7273, 13397 Marseille,  
France  
E-mail: (catherine.lefay@univ-amu.fr)

Dr. M. Maresca  
Aix-Marseille Université, CNRS, Centrale Marseille, iSm2, Marseille 13397, France

Dr. L. Fontaine, Dr. B. Caron, Dr. A. Leroux, M. Lemesle, J.-L. Coussegal  
VYGON Ecouen 95440, France

Dr. Olivier Soppera  
Université de Haute-Alsace, CNRS, IS2M, UMR 7361, Mulhouse F-68100, France  
Université de Strasbourg, Strasbourg F-67000, France

Dr. S. Canaan, I. Poncin  
Aix-Marseille Univ., CNRS, LISM UMR7255, IMM-UAR2044, 31 Chemin Joseph Aiguier,  
13009 Marseille, France

Dr. Elizabeth A. Murphy  
Materials Research Laboratory, University of California, Santa Barbara, California, USA  
BioPACIFIC Materials Innovation Platform, University of California, Santa Barbara,  
California, USA  
Department of Chemistry and Biochemistry, University of California, Santa Barbara,  
California, USA

Pr. Christopher M. Bates

Materials Research Laboratory, University of California, Santa Barbara, California, USA  
Materials Department, University of California, Santa Barbara, California, USA

Dr. Phong H. Nguyen

Department of Chemical Engineering, University of California, Santa Barbara, California, USA

Dr. Phillip A. Kohl

Materials Research Laboratory, University of California, Santa Barbara, California, USA

BioPACIFIC Materials Innovation Platform, University of California, Santa Barbara,  
California, USA

**Keywords:** antibacterial, diblock copolymer, additive, extrusion, polyurethane, medical devices

## Thermogravimetric analysis (TGA)

Thermogravimetric analyses were performed using a PerkinElmer 8000 instrument with a temperature ramp from 40 to 800 °C at a heating rate of 10 °C.min<sup>-1</sup> under a nitrogen atmosphere with a flow rate of 20 mL min<sup>-1</sup>.

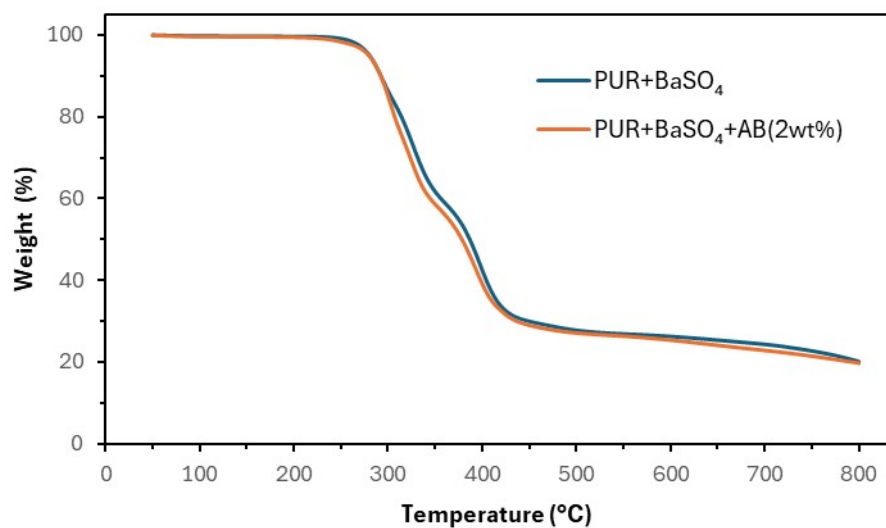

**Figure S1.** Percentage of mass loss as a function of temperature measured by TGA for the PU (with BaSO<sub>4</sub>) with 2wt% of the antibacterial (AB) PBMA-*b*-PQDMAEMA copolymer (orange curve) and without AB copolymer (blue curve).

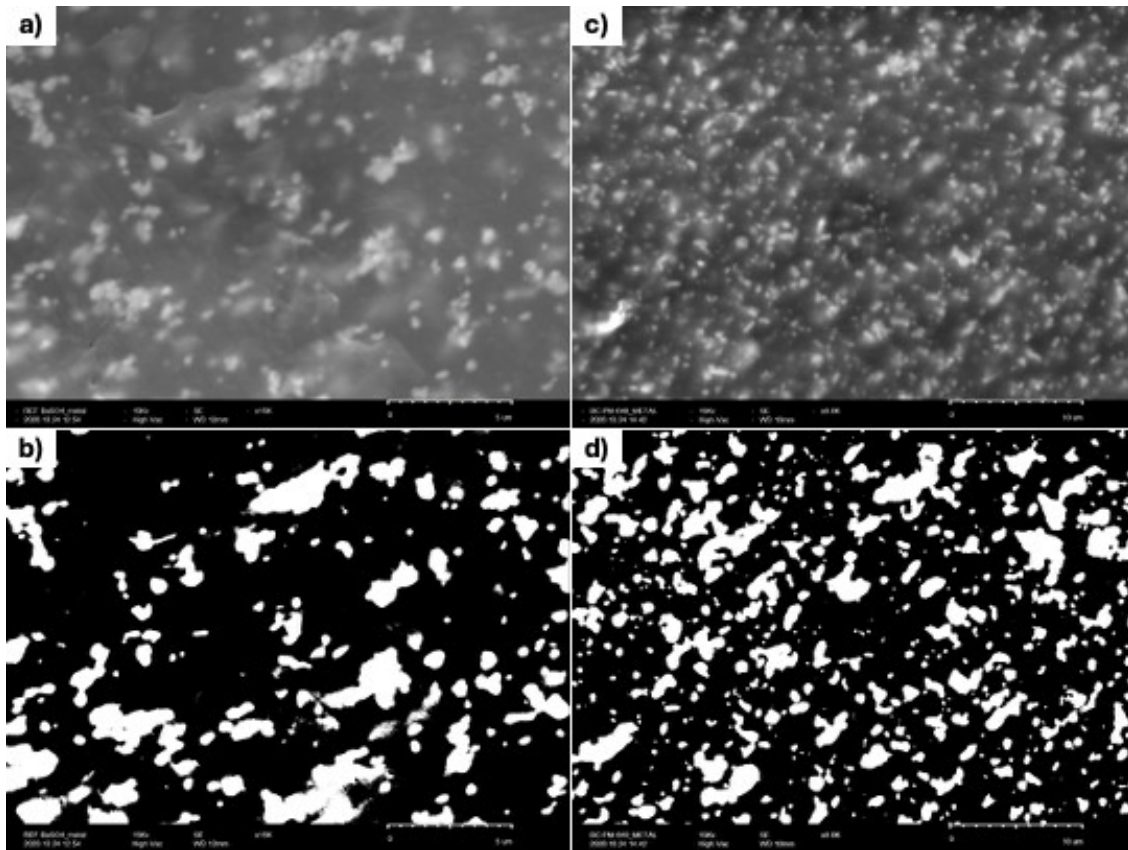

**Figure S2.** SEM images of PU material surfaces: a) metallized reference PU containing 20 wt% BaSO<sub>4</sub> observed by SEM at 8K magnification and b) processing of this image using ImageJ, c) antibacterial PU containing 20 wt% BaSO<sub>4</sub> and 2 wt% antibacterial copolymer metallized observed by SEM at 8K magnification and d) processing of this image using ImageJ. Each analysis is performed at 15 kV and under high vacuum. The high-contrast areas correspond to the BaSO<sub>4</sub> content (19.58 % and 22.49 %, respectively). a) and b) 5 µm and c) and d) 10 µm.

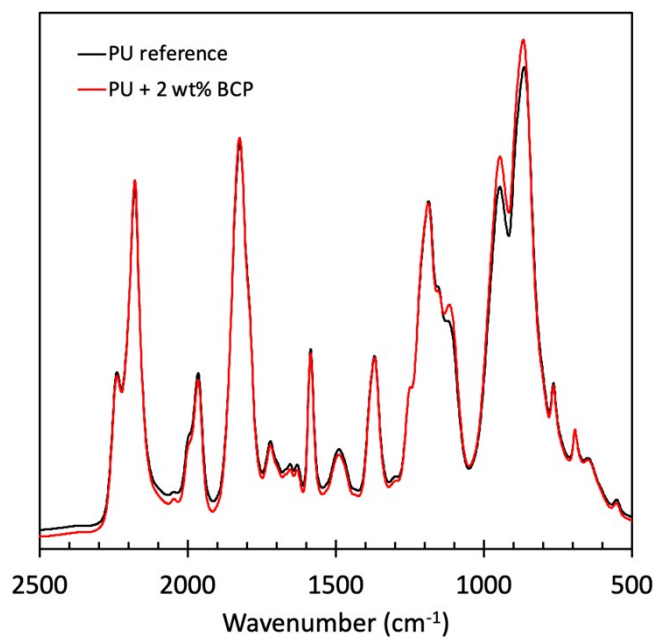

**Figure S3.** ATR analyses (Diamond crystal) of PU without (black) and with 2 wt% of antibacterial copolymer (red).

### Grazing-incidence and transmission SAXS measurements

Transmission-mode SAXS measurements were performed with a five-minute exposure time to characterize bulk morphology. Small-angle X-ray scattering (SAXS) measurements were performed using a custom-built, high-brilliance laboratory beamline at the BioPACIFIC Materials Innovation Platform, UC Santa Barbara. Grazing-incidence SAXS (GI-SAXS) measurements were performed at an incident angle of  $0.2^\circ$ , near the critical angle for total external reflection, which limits the X-ray penetration depth to the top surface. GI-SAXS data were collected with 30-minute exposures, enabling detailed analysis of near-surface nanostructures and anisotropic features.

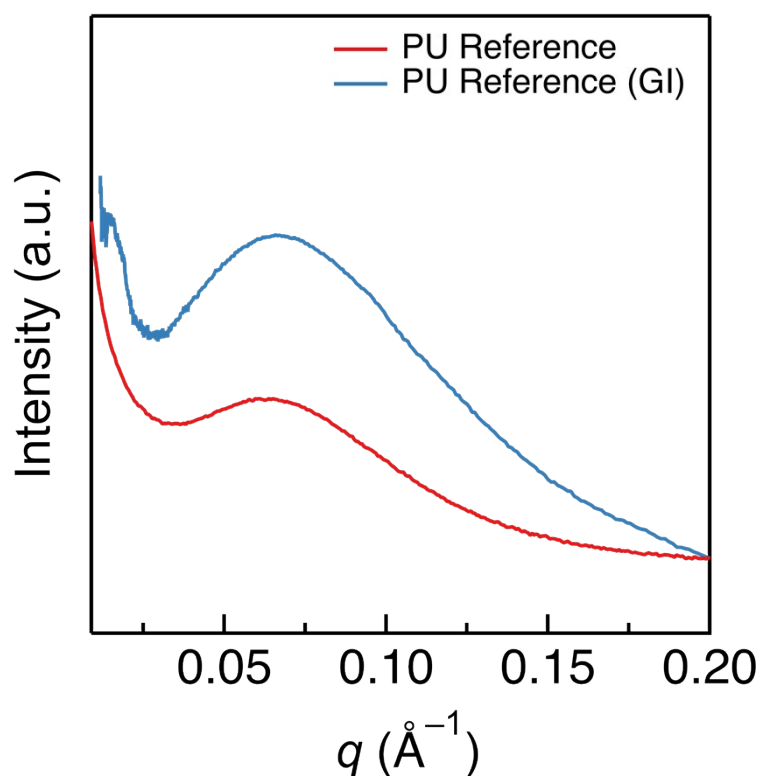

**Figure S4.** PU analyzed by GI-SAXS (blue) and SAXS in transmission mode (red).

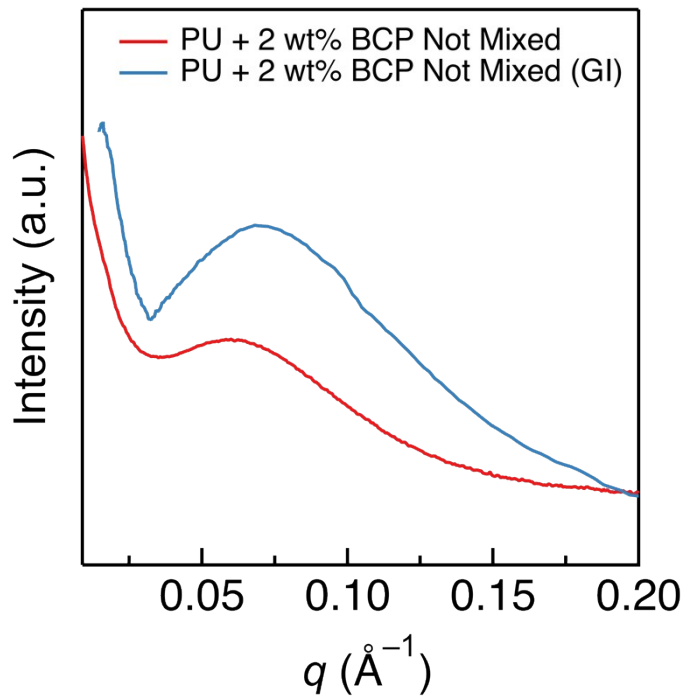

**Figure S5.** PU + 2wt% of AB copolymer (noted BCP) without pre-compounding analyzed by GI-SAXS (blue) and SAXS in transmission mode (red).

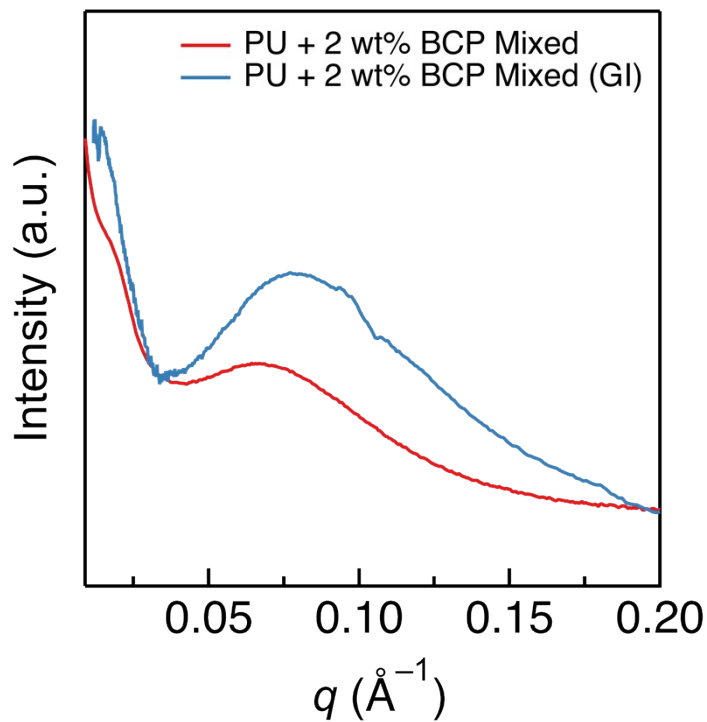

**Figure S6.** PU + 2wt% of AB copolymer (noted BCP) with pre-compounding analyzed by GI-SAXS (blue) and SAXS in transmission mode (red).
